# Supplementary material for: Lipocalin-2 Deficiency Attenuates Insulin Resistance Associated With Aging and Obesity
Source: PubMed Central journal article supplement — Diabetes. 2010 Jan 12;59(4):872–82. doi: 10.2337/db09-1541 (PMC2844835; doi:10.2337/db09-1541), 2010-01-12

## Supplementary Materials

Supplementary Table 1. List of primers used for quantitative PCR analysis.

| Gene name                    | Gene symbol   | Accession IDs | Sequence range | Product size (bp) | Primer sequences                                                                                 |
|------------------------------|---------------|---------------|----------------|-------------------|--------------------------------------------------------------------------------------------------|
| β-actin                      | <i>Actb</i>   | gi 145966868  | 851-1028       | 178               | Forward 5'-AGT GTG ACG TTG ACA TCC GT-3'; Reverse 5'-CCA CCG ATC CAC ACA GAG TA-3'               |
| CD14                         | <i>CD14</i>   | gi 118129882  | 314-477        | 163               | Forward 5'-GCA GAT GTG GAA TTG TAC GG-3'; Reverse 5'-GCT CCG AAT AGA ATC CGA CT-3'               |
| F4/80                        | <i>Emr1</i>   | gi 183583543  | 2109-2235      | 126               | Forward 5'-TTG GCC AAG ATT CTC TTC CT-3'; Reverse 5'-TCA CTG CCT CCA CTA GCA TC-3'               |
| IL-1β                        | <i>Il1b</i>   | gi 118130747  | 197-388        | 191               | Forward 5'-TGA TGA GAG CAT CCA GCT TC-3'; Reverse 5'-CAT GAG TCA CAG AGG ATG GG-3'               |
| IL-2                         | <i>Il2</i>    | gi 31982837   | 221-361        | 140               | Forward 5'-CCT GAG CAG GAT GGA GAA TTA CA-3'; Reverse 5'-TCC AGA ACA TGC CGC AGA G-3'            |
| IL-6                         | <i>Il6</i>    | gi 13624310   | 564-718        | 154               | Forward 5'-TGG AGT CAC AGA AGG AGT GGC TAA G-3'; Reverse 5'-TCT GAC CAC AGT GAG GAA TGT CCA C-3' |
| IL-8                         | <i>Il8</i>    | gi 141802720  | 116-224        | 108               | Forward 5'-ATG GCT GGG ATT CAC CTC AA-3'; Reverse 5'-AAG CCT CGC GAC CAT TCT T-3'                |
| MCP1                         | <i>Ccl2</i>   | gi 141803162  | 210-341        | 131               | Forward 5'-TGA TCC CAA TGA GTA GGC TGG AG-3'; Reverse 5'-ATG TCT GGA CCC ATT CCT TCT TG-3'       |
| TNFα                         | <i>Tnf</i>    | gi 133892368  | 440-646        | 206               | Forward 5'-TCG TAG CAA ACC ACC AAG TG-3'; Reverse 5'-AGA TAG CAA ATC GGC TGA CG-3'               |
| Resistin                     | <i>Retn</i>   | gi 21687157   | 121-316        | 196               | Forward 5'-AAC TCC CTG TTT CCA AAT GC-3'; Reverse 5'-GGG CTG CTG TCC AGT CTA TC-3'               |
| Adiponectin                  | <i>ADIPOQ</i> | gi 87252710   | 378-544        | 166               | Forward 5'-CAC TGT TCC CAA TGT ACC CA-3'; Reverse 5'-CCT TCT TGA AGA GGC TCA CC-3'               |
| Cyclooxygenase-1             | <i>Ptgs1</i>  | gi 144227245  | 255-431        | 176               | Forward 5'-TAC TAT CCG TGC CAG AAC CA-3'; Reverse 5'-TCC ATG TGT CAG CAG GAA AT-3'               |
| Cyclooxygenase-2             | <i>Ptgs2</i>  | gi 118130137  | 2912-3061      | 149               | Forward 5'-AAG ACT TGC CAG GCT GAA CT-3'; Reverse 5'-CTT CTG CAG TCC AGG TTC AA-3'               |
| Arachidonate 5-lipoxygenase  | <i>Alox5</i>  | gi 116686109  | 1129-1294      | 165               | Forward 5'-CAT CCA GCT CAA CCA AAC C-3'; Reverse 5'-ACC AAA CAC CTC AGA CAC CA-3'                |
| Arachidonate 8-lipoxygenase  | <i>Alox8</i>  | gi 133893229  | 1703-1860      | 157               | Forward 5'-GTT CAG GCC AGT TCG ACT CT-3'; Reverse 5'-CAG CCA GAG AGC AAT GAT GT-3'               |
| Arachidonate 12-lipoxygenase | <i>Alox12</i> | gi 145966724  | 1479-1631      | 152               | Forward 5'-CAC TGC CAG GTA TGT GAA GG-3'; Reverse 5'-GAC TGG AAG GAG ACA GGG AA-3'               |
| Arachidonate 15-lipoxygenase | <i>Alox15</i> | gi 134948632  | 1433-1632      | 199               | Forward 5'-GCA AGT CAT GAA TCG GTA CG-3'; Reverse 5'-TGA AGA TGC ACA TGG TGA TG-3'               |

Supplementary Table 2. Lipid profiles measured in serum and tissue samples collected from different groups of animals.

| Treatment group                                   | <u>Normal diet (24-week old)</u> |            | <u>18 weeks of high Fat diet</u> |             | <u>Overexpressing (wild type, 12-week old)</u> |             | <u>Overexpressing (Lcn2-KO, 12-week old)</u> |             |
|---------------------------------------------------|----------------------------------|------------|----------------------------------|-------------|------------------------------------------------|-------------|----------------------------------------------|-------------|
|                                                   | Wild type                        | Lcn2-KO    | Wild type                        | Lcn2-KO     | luciferase                                     | Lipocalin-2 | luciferase                                   | Lipocalin-2 |
| Mice group                                        | Wild type                        | Lcn2-KO    | Wild type                        | Lcn2-KO     | luciferase                                     | Lipocalin-2 | luciferase                                   | Lipocalin-2 |
| Serum TG (mg/dL)                                  | 42.8±1.44                        | 33.3±3.98* | 73.6±4.88                        | 70.4±6.48   | 39.2±9.25                                      | 37.2±8.38   | 36.2±6.41                                    | 39.2±9.79   |
| Serum TC (mg/dL)                                  | 45.1±6.19                        | 12.5±3.20* | 65.4±10.31                       | 46.5±12.33* | 26.0±2.89                                      | 32.4±7.50   | 13.9±3.38                                    | 13.4±6.37   |
| Serum FFA (mmol/L)                                | 1.1±0.08                         | 0.9±0.27   | 0.9±0.01                         | 1.0±0.11    | 1.1±0.34                                       | 0.92±0.32   | 1.0±0.22                                     | 1.0±0.11    |
| TG in liver (x10 <sup>-3</sup> mg/mg)             | 12.3±3.67                        | 8.1±2.40   | 20.0±0.85                        | 6.8±1.21*   | 11.2±5.1                                       | 12.6±1.8    | 10.0±5.80                                    | 10.1±2.70   |
| TG in epididymal fat (x10 <sup>-3</sup> mg/mg)    | 21.1±1.63                        | 33.1±1.66* | 36.7±0.89                        | 64.3±2.95*  | 15.8±0.81                                      | 9.8±1.45*   | 25.1±1.56                                    | 13.3±1.70*  |
| TG in muscle (x10 <sup>-3</sup> mg/mg)            | 15.1±8.17                        | 6.1±3.22*  | 22.0±9.78                        | 24.6±16.3   | 16.3±9.21                                      | 23.3±1.4*   | 11.2±0.72                                    | 25.0±1.92*  |
| FFA in liver (x10 <sup>-6</sup> mmol/mg)          | 1.5±0.34                         | 1.5±0.62   | 4.5±0.92                         | 3.8±0.17*   | 1.1±0.31                                       | 0.83±0.13   | 1.0±0.28                                     | 0.9±0.14    |
| FFA in epididymal fat (x10 <sup>-6</sup> mmol/mg) | 22.7±1.61                        | 30.8±7.45* | 13.0±1.67                        | 21.0±8.71*  | 20.3±1.57                                      | 15.4±3.62*  | 27.6±3.37                                    | 17.7±3.81*  |
| FFA in muscle (x10 <sup>-6</sup> mmol/mg)         | 2.6±1.12                         | 1.4±0.59*  | 2.95±0.48                        | 2.67±0.15   | 5.3±0.15                                       | 7.6±0.15*   | 3.3±0.25                                     | 4.6±0.11*   |
| TC in liver (x10 <sup>-3</sup> mg/mg)             | 0.5±0.16                         | 0.6±0.14   | 0.7±0.09                         | 0.6±0.11    | 1.4±0.14                                       | 1.0±0.47    | 0.8±0.28                                     | 1.3±0.18    |
| TC in epididymal fat (x10 <sup>-3</sup> mg/mg)    | 1.8±0.09                         | 2.3±0.47*  | 0.5±0.19                         | 0.8±0.09*   | 0.4±0.23                                       | 0.1±0.07*   | 0.6±0.43                                     | 0.1±0.21*   |
| TC in muscle (x10 <sup>-3</sup> mg/mg)            | 2.8±0.34                         | 1.0±0.34*  | 2.5±0.12                         | 2.3±0.13    | 3.1±0.38                                       | 4.4±1.08*   | 2.1±0.28                                     | 3.8±1.02*   |

\* P<0.05 versus the corresponding control mice group (n = 5-9).

Supplementary Table 3. Quantitative PCR comparison of inflammatory genes expressed in epididymal fat pads collected from high fat fed animals.

|                | IL6             | IL8             | IL2             | CD14             | MCP1             | F4/80            | TNF $\alpha$     | IL1 $\beta$     |
|----------------|-----------------|-----------------|-----------------|------------------|------------------|------------------|------------------|-----------------|
| Wild type mice | 2.33 $\pm$ 1.25 | 2.57 $\pm$ 0.71 | 0.46 $\pm$ 0.14 | 1.01 $\pm$ 0.72  | 2.75 $\pm$ 1.41  | 2.28 $\pm$ 0.60  | 3.62 $\pm$ 2.20  | 0.27 $\pm$ 0.12 |
| Lcn2-KO mice   | 2.86 $\pm$ 0.90 | 3.26 $\pm$ 1.12 | 0.62 $\pm$ 0.51 | 0.31 $\pm$ 0.09* | 1.40 $\pm$ 0.60* | 0.55 $\pm$ 0.16* | 0.83 $\pm$ 0.48* | 0.21 $\pm$ 0.09 |

Data were presented as the fold changes over the mice fed with normal chow.

\* P<0.05 versus the wild type mice group (n = 5-9).

### **Supplementary Figure legends:**

Supplementary Figure 1: Lipocalin-2 treatment attenuates insulin sensitivity in mice. *A*, Western Blotting was used to measure protein levels of lipocalin-2 in liver lysates. Samples were taken from wild type (left panel) and Lcn2-KO (right panel) mice two-weeks after recombinant adenovirus injection and subjected to SDS-PAGE and Western Blotting analysis using the in-house polyclonal anti-murine lipocalin-2 antibody. *B*, Serum samples taken at five days after recombinant adenovirus injection were analysed with the in-house mouse lipocalin-2 ELISA as described in Methods. \*  $P < 0.05$  vs day 0,  $n=5$ . At the end of 2 wks' treatment, fasting serum insulin levels, fasting glucose levels and HOMA-IR indexes were measured for wild type (*C*) and Lcn2-KO mice (*D*) injected with recombinant adenovirus encoding luciferase (rAd-luciferase) or lipocalin-2 (rAd-Lcn2) as described in Methods. \*  $P < 0.05$  vs rAd-luciferase group,  $n=5$ .

Supplementary Figure 2. Increased lipogenesis and decreased lipolysis in the fat tissues of mice without lipocalin-2. The epididymal fat pads were collected from mice that were fed with high fat diets for six weeks, and subjected to analyses on lipolysis (by measuring the glycerol released into the culture medium), uptake of  $^3\text{H}$ -palmitate, and lipogenesis (D-[3- $^3\text{H}$ ] glucose labeling and lipid extraction). \*  $P < 0.05$  versus vehicle-treated samples derived from wide type mice; #  $P < 0.05$  versus vehicle treated Lcn2-KO mice,  $n=6$ .

Supplementary Figure 3: Analysis of the tissue insulin sensitivity in liver and skeletal muscle of wild type and Lcn2-KO mice. *A*, Tissues were collected from normal chow, or high fat diet fed wild type and Lcn2-KO mice that were acutely injected with insulin as described in Methods. Both basal and insulin-stimulated phosphorylations of IRbeta and Akt were evaluated by Western Blotting analysis. *B*, Insulin-stimulated glucose uptake was measured in

isolated soleus muscles from wild type and Lcn2-KO mice under either normal chow or high fat diet feeding. C, Quantitative PCR analysis of the gene expression levels of glucose 6-phosphatase (G6P) and phosphoenolpyruvate carboxykinase (PEPCK) in the liver tissues of wild type and Lcn2-KO mice under normal chow or high fat diet feeding. Fold changes were calculated against those of normal chow-fed wild type mice. \*  $P < 0.05$  vs wild type mice of the same group, n=3-6.

Supplementary Figure 4. GC-MS analysis of fatty acid compositions in lipid extracts from epididymal adipose, liver and soleus skeletal muscle. 25 mg epididymal adipose tissue, liver and muscle were homogenized in a mixture of 0.5 ml 4% methanolic HCl, 0.5 ml methanol and 125  $\mu$ l hexane. After the addition of internal standard I (5  $\mu$ l, 20 mg/ml nonadecanoic acid C19:0), the mixture was boiled at 100°C for 60 minutes and mixed with 1ml hexane and 1ml of deionized H<sub>2</sub>O. The upper layer was collected and the internal standard II (5  $\mu$ l, 10 mg/ml tridecanoic acid methyl ester methyl C13:0) was added. The volume of the samples was reduced by evaporation under nitrogen flow. Methyl esters were analyzed by gas chromatography in a 6890N Network GC system (Agilent) attached with 5973 Network Mass Selective Detector (Agilent) on a 30 m bonded 5% phenyl, 95% dimethylpolysiloxane (30 m x 0.2 mm inner diameter x 0.25  $\mu$ m film thickness) HP-5ms column (Agilent). Carrier gas is helium and the flow was maintained at 0.9 ml/min and the temperature was programmed from 130°C (2 min isothermal), 140°C at 4°C/min to 200°C, 200°C at 3°C/min to 240°C, 240°C at 4°C/min to 260°C (10 min isothermal). The concentration of each fatty acid species was quantified by relating its peak area to the area of the fatty acid standard (Supelco® 37 Component FAME mix, 10mg/ml).

Supplementary Figure 5. Measurement of iron contents in adipose tissues by inductively coupled plasma-mass spectrometry analysis. The sum of stable  $^{54}\text{Fe}$ ,  $^{56}\text{Fe}$ ,  $^{57}\text{Fe}$ ,  $^{58}\text{Fe}$  isotopes were calculated by referring to the  $\text{FeCl}_3$  standard curve. Adipose tissues were collected from 24-week old mice that were fed with either standard chow or high fat diets. \*,  $P < 0.05$  vs wide type mice fed with standard chow,  $n=6$ .

Supplementary Figure 1

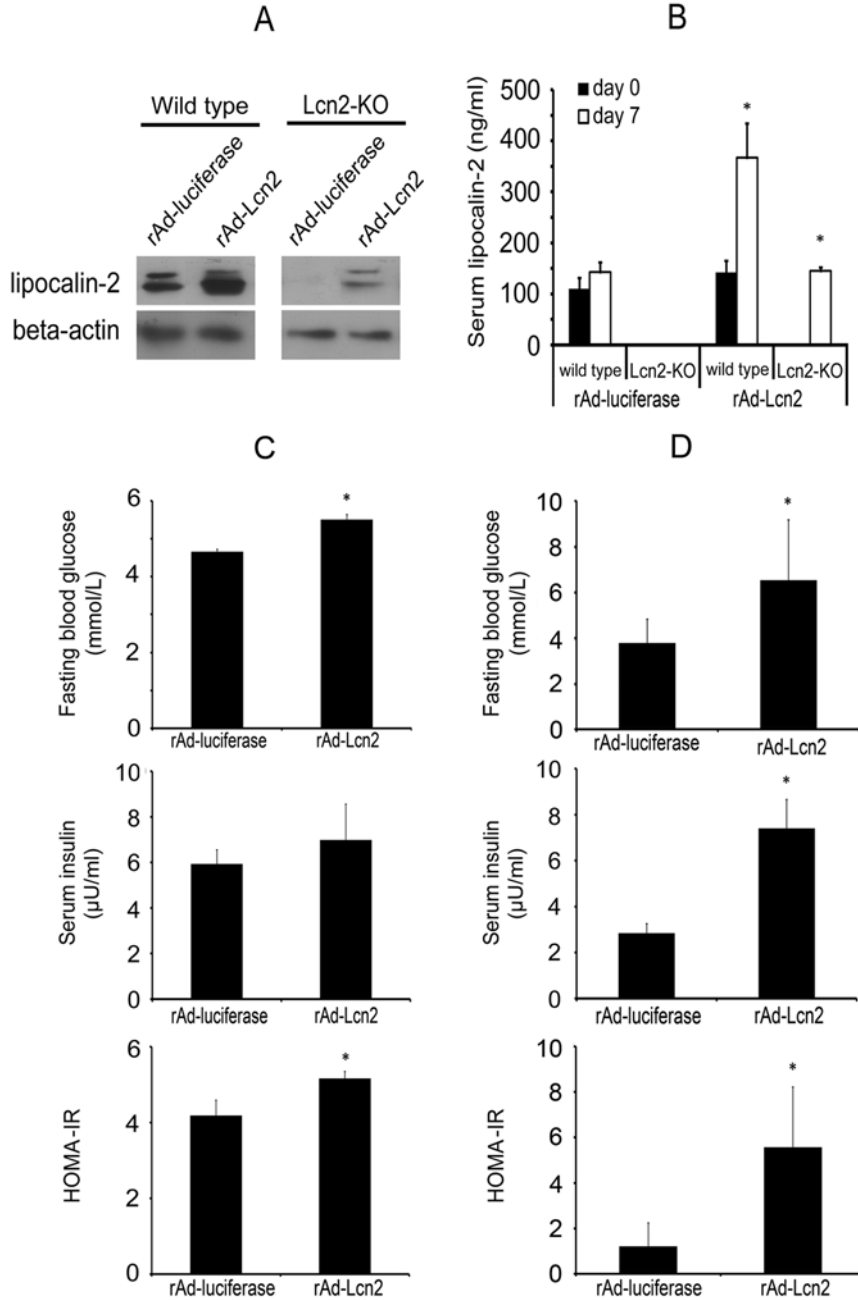



Supplementary Figure 2

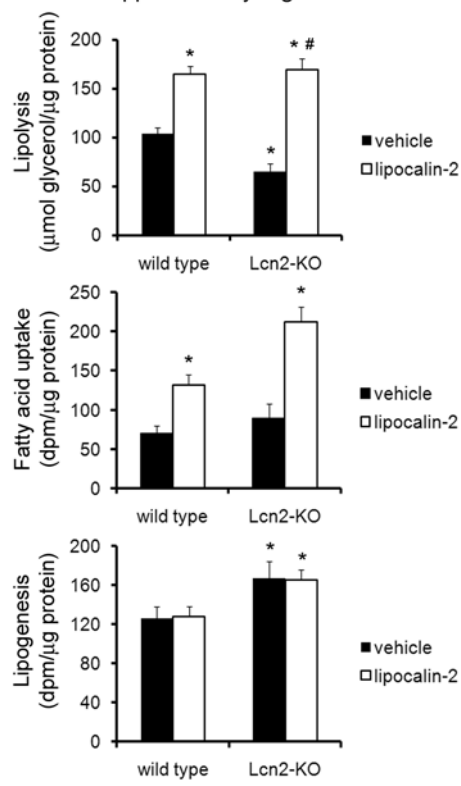

### Supplementary Figure 3

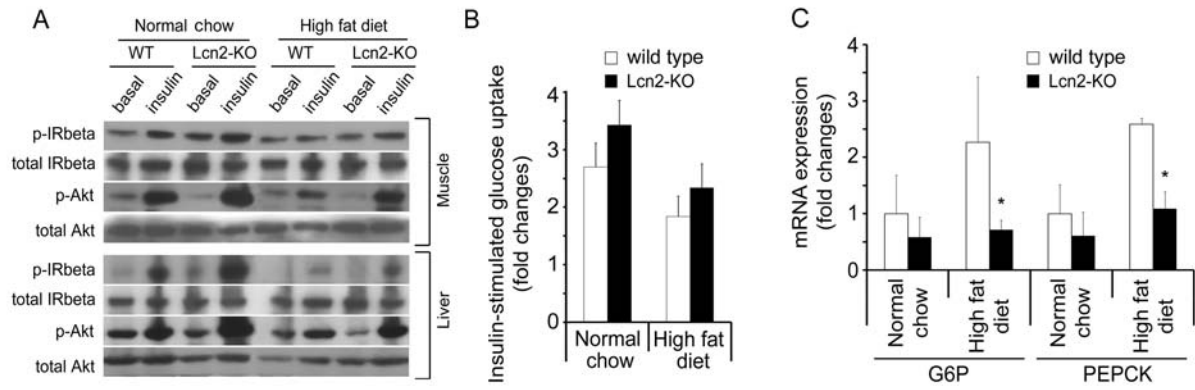

Supplementary Figure 4

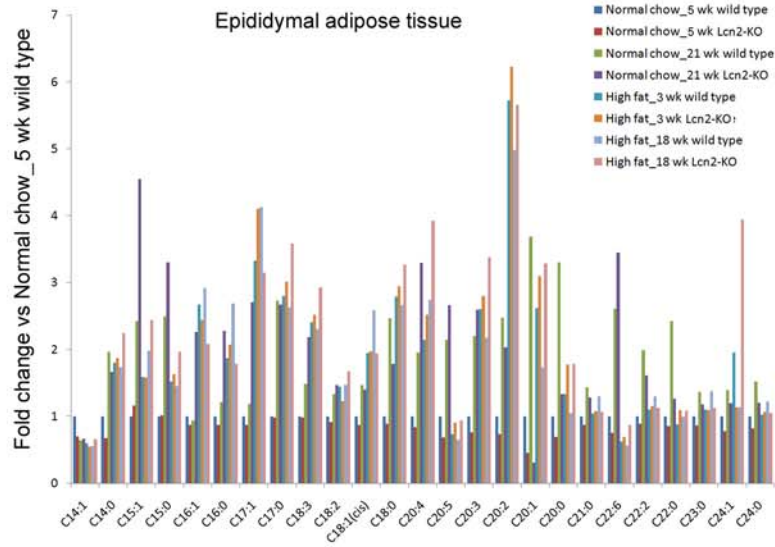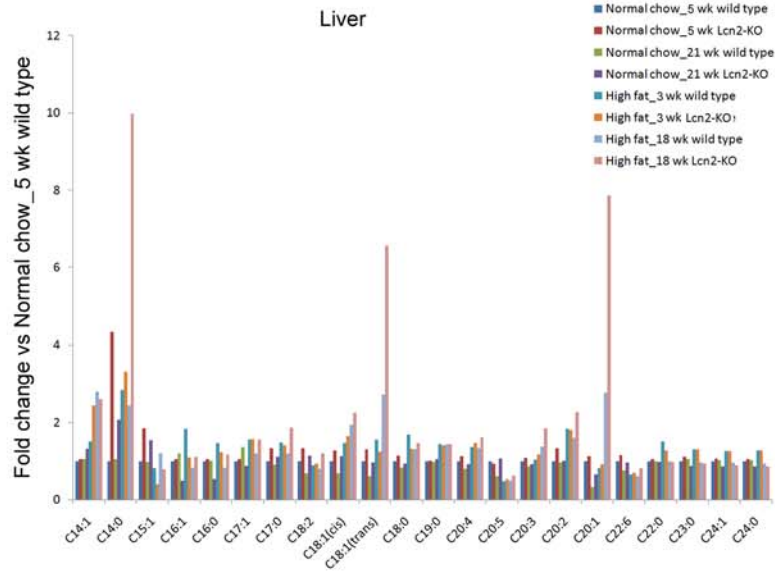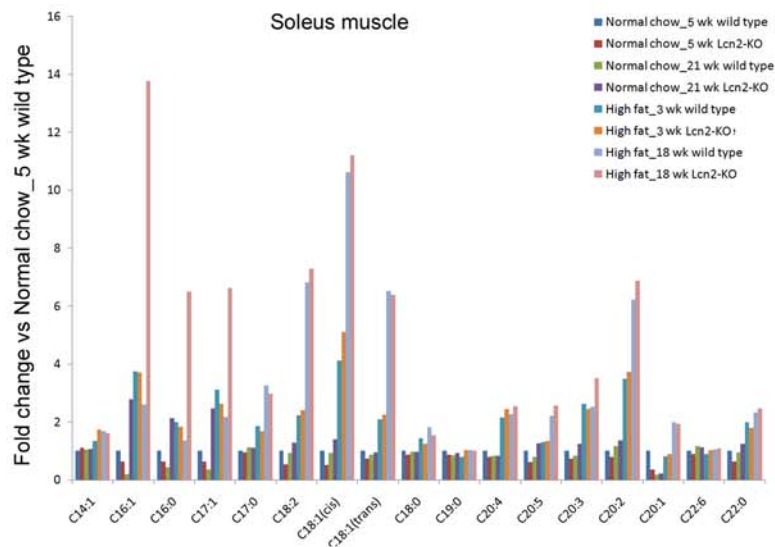

Supplementary Figure 5

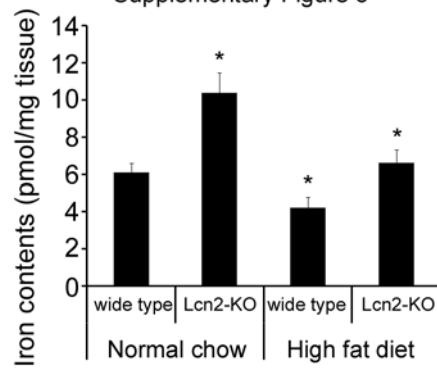

Supplement: supp_db09-1541_Online-Only_Appendix.pdf [file supp_db09-1541_Online-Only_Appendix.pdf]
